# Supplementary material for: Postfire responses of the woody flora of Central Chile: Insights from a germination experiment
Source: PLoS One. 2017 Jul 12;12(7):e0180661. doi: 10.1371/journal.pone.0180661 (PMC5507535; doi:10.1371/journal.pone.0180661)
Supplement: S1 File — (XLSX) [file pone.0180661.s007.xlsx]

## Sheet: Hoja1
Species	treatment	block	n	germination	survival
K. angustifolia	C	1	50	46	46
K. angustifolia	C	2	49	41	41
K. angustifolia	C	3	50	46	46
K. angustifolia	C	4	50	47	47
K. angustifolia	T100	1	50	47	47
K. angustifolia	T100	2	50	47	47
K. angustifolia	T100	3	50	49	49
K. angustifolia	T100	4	50	40	40
K. angustifolia	T120	1	50	4	9
K. angustifolia	T120	2	50	0	0
K. angustifolia	T120	3	50	0	5
K. angustifolia	T120	4	50	11	12
K.oblonga	C	1	50	47	47
K.oblonga	C	2	50	50	50
K.oblonga	C	3	50	47	47
K.oblonga	C	4	50	47	47
K.oblonga	T100	1	50	44	44
K.oblonga	T100	2	50	48	48
K.oblonga	T100	3	50	49	49
K.oblonga	T100	4	49	49	49
K.oblonga	T120	1	50	29	35
K.oblonga	T120	2	50	18	25
K.oblonga	T120	3	50	11	17
K.oblonga	T120	4	50	24	30
R. trinervia	C	1	50	1	37
R. trinervia	C	2	50	2	33
R. trinervia	C	3	50	4	29
R. trinervia	C	4	50	1	49
R. trinervia	T100	1	50	3	42
R. trinervia	T100	2	50	3	21
R. trinervia	T100	3	50	3	30
R. trinervia	T100	4	50	5	37
R. trinervia	T120	1	50	13	38
R. trinervia	T120	2	50	10	30
R. trinervia	T120	3	50	8	39
R. trinervia	T120	4	50	9	41
R. ephedra	C	1	20	1	14
R. ephedra	C	2	19	0	14
R. ephedra	C	3	20	1	16
R. ephedra	C	4	20	2	18
R. ephedra	T100	1	20	2	16
R. ephedra	T100	2	20	1	16
R. ephedra	T100	3	20	1	14
R. ephedra	T100	4	20	2	18
R. ephedra	T120	1	20	1	18
R. ephedra	T120	2	20	0	13
R. ephedra	T120	3	20	1	16
R. ephedra	T120	4	20	9	19
Q. saponaria	C	1	50	3	17
Q. saponaria	C	2	50	7	20
Q. saponaria	C	3	50	8	25
Q. saponaria	C	4	50	13	28
Q. saponaria	T100	1	50	2	26
Q. saponaria	T100	2	50	3	31
Q. saponaria	T100	3	50	10	34
Q. saponaria	T100	4	50	7	11
Q. saponaria	T120	1	50	0	45
Q. saponaria	T120	2	50	0	35
Q. saponaria	T120	3	50	0	30
Q. saponaria	T120	4	50	0	15
M. boaria	C	1	40	7	30
M. boaria	C	2	40	3	33
M. boaria	C	3	40	0	19
M. boaria	C	4	40	0	24
M. boaria	T100	1	40	2	32
M. boaria	T100	2	40	0	20
M. boaria	T100	3	40	0	16
M. boaria	T100	4	40	0	4
M. boaria	T120	1	40	0	0
M. boaria	T120	2	40	0	0
M. boaria	T120	3	40	0	0
M. boaria	T120	4	40	0	0
C. odorifera	C	1	40	18	28
C. odorifera	C	2	40	9	31
C. odorifera	C	3	40	17	26
C. odorifera	C	4	40	7	23
C. odorifera	T100	1	40	17	28
C. odorifera	T100	2	40	13	28
C. odorifera	T100	3	40	16	27
C. odorifera	T100	4	40	15	34
C. odorifera	T120	1	40	1	13
C. odorifera	T120	2	40	2	21
C. odorifera	T120	3	40	4	21
C. odorifera	T120	4	40	0	28
A. caven	C	1	45	5	45
A. caven	C	2	49	0	47
A. caven	C	3	41	4	35
A. caven	C	4	43	1	42
A. caven	T100	1	48	1	41
A. caven	T100	2	48	5	48
A. caven	T100	3	49	0	49
A. caven	T100	4	47	1	46
A. caven	T120	1	49	1	47
A. caven	T120	2	48	0	46
A. caven	T120	3	47	1	47
A. caven	T120	4	50	2	50
B. globosa	C	1	40	3	3
B. globosa	C	2	40	0	8
B. globosa	C	3	40	5	5
B. globosa	C	4	40	6	6
B. globosa	T100	1	40	0	0
B. globosa	T100	2	40	2	2
B. globosa	T100	3	40	1	1
B. globosa	T100	4	40	0	0
B. globosa	T120	1	40	0	0
B. globosa	T120	2	40	0	0
B. globosa	T120	3	40	0	0
B. globosa	T120	4	40	0	0
P. mitiqui	C	1	50	30	30
P. mitiqui	C	2	50	22	22
P. mitiqui	C	3	50	35	35
P. mitiqui	C	4	50	35	35
P. mitiqui	T100	1	50	0	5
P. mitiqui	T100	2	50	0	20
P. mitiqui	T100	3	50	0	0
P. mitiqui	T100	4	50	0	0
P. mitiqui	T120	1	50	0	15
P. mitiqui	T120	2	50	0	0
P. mitiqui	T120	3	50	0	0
P. mitiqui	T120	4	50	0	0
C. integerrima	C	1	25	14	19
C. integerrima	C	2	25	16	20
C. integerrima	C	3	25	16	16
C. integerrima	C	4	25	19	21
C. integerrima	T100	1	25	4	17
C. integerrima	T100	2	25	9	17
C. integerrima	T100	3	25	1	18
C. integerrima	T100	4	25	0	15
C. integerrima	T120	1	25	0	22
C. integerrima	T120	2	25	0	7
C. integerrima	T120	3	25	0	25
C. integerrima	T120	4	25	0	17
A. petiolaris	C	1	50	8	8
A. petiolaris	C	2	50	46	46
A. petiolaris	C	3	50	44	44
A. petiolaris	C	4	43	16	16
A. petiolaris	T100	1	50	0	0
A. petiolaris	T100	2	50	0	0
A. petiolaris	T100	3	48	0	0
A. petiolaris	T100	4	47	0	0
A. petiolaris	T120	1	49	0	0
A. petiolaris	T120	2	50	0	0
A. petiolaris	T120	3	50	0	0
A. petiolaris	T120	4	50	0	0
C. parqui	C	1	47	47	47
C. parqui	C	2	50	50	50
C. parqui	C	3	48	46	46
C. parqui	C	4	50	49	49
C. parqui	T100	1	50	0	9
C. parqui	T100	2	50	0	5
C. parqui	T100	3	40	0	0
C. parqui	T100	4	50	0	5
C. parqui	T120	1	50	0	2
C. parqui	T120	2	50	0	3
C. parqui	T120	3	50	0	22
C. parqui	T120	4	50	0	3
C. alba	C	1	27	21	21
C. alba	C	2	27	21	21
C. alba	C	3	26	23	23
C. alba	C	4	27	23	23
C. alba	T100	1	28	21	21
C. alba	T100	2	28	23	23
C. alba	T100	3	28	21	21
C. alba	T100	4	28	21	21
C. alba	T120	1	28	24	24
C. alba	T120	2	26	19	19
C. alba	T120	3	28	23	23
C. alba	T120	4	28	22	22
O. glansulosum	C	1	50	42	50
O. glansulosum	C	2	51	46	50
O. glansulosum	C	3	50	43	50
O. glansulosum	C	4	51	44	51
O. glansulosum	T100	1	50	47	50
O. glansulosum	T100	2	50	47	50
O. glansulosum	T100	3	50	44	47
O. glansulosum	T100	4	50	50	50
O. glansulosum	T120	1	50	8	8
O. glansulosum	T120	2	49	11	11
O. glansulosum	T120	3	52	7	7
O. glansulosum	T120	4	47	3	3
S. macrocarpa	C	1	30	4	20
S. macrocarpa	C	2	30	2	22
S. macrocarpa	C	3	30	8	13
S. macrocarpa	C	4	30	7	28
S. macrocarpa	T100	1	30	11	29
S. macrocarpa	T100	2	30	9	28
S. macrocarpa	T100	3	30	5	30
S. macrocarpa	T100	4	30	2	30
S. macrocarpa	T120	1	30	5	27
S. macrocarpa	T120	2	30	14	28
S. macrocarpa	T120	3	30	12	28
S. macrocarpa	T120	4	30	12	19
S. candolleana	C	1	50	2	36
S. candolleana	C	2	50	1	35
S. candolleana	C	3	50	2	31
S. candolleana	C	4	50	2	36
S. candolleana	T100	1	50	3	50
S. candolleana	T100	2	50	2	50
S. candolleana	T100	3	50	6	46
S. candolleana	T100	4	50	7	50
S. candolleana	T120	1	50	2	50
S. candolleana	T120	2	50	0	50
S. candolleana	T120	3	50	2	50
S. candolleana	T120	4	50	0	50
P. boldus	C	1	50	0	15
P. boldus	C	2	50	0	25
P. boldus	C	3	50	0	35
P. boldus	C	4	50	0	25
P. boldus	T100	1	50	0	35
P. boldus	T100	2	50	0	35
P. boldus	T100	3	50	0	45
P. boldus	T100	4	50	0	30
P. boldus	T120	1	50	0	45
P. boldus	T120	2	50	0	45
P. boldus	T120	3	50	0	50
P. boldus	T120	4	50	0	45

## Sheet: Hoja2
		estimulation response				inhibition response
		germination		survival		germination		survival
species	storage (months)	100°C	120°C	100°C	120°C	100°C	120°C	100°C	120°C
Acacia caven	10	0	0	0	0	0	0	0	0
Azara petiolaris	4	0	0	0	0	1	1	1	1
Baccharis linearis	10	0	NA	NA	NA	0	NA	NA	NA
Buddleja globosa	6	0	0	0	0	1	1	1	1
Cestrum parqui	6	0	0	0	0	1	1	1	1
Colliguaja integerrima	6	0	0	0	0	1	1	0	0
Colliguaja odorifera	12	0	0	0	0	0	1	0	1
Cryptocarya alba	6	0	0	0	0	0	0	0	0
Kageneckia angustifolia	10	0	0	0	0	0	1	0	1
Kageneckia oblonga	10	0	0	0	0	0	1	0	1
Lithraea caustica	8	1	NA	NA	NA	0	NA	NA	NA
Maytenus boaria	10	0	0	0	0	0	1	0	1
Muehlenbekia hastulata	8	1	NA	NA	NA	0	NA	NA	NA
Peumus boldus	10	0	0	1	1	0	0	0	0
Podanthus mitiqui	4	0	0	0	0	1	1	1	1
Otholobium glandulosum	19	1	0	0	0	0	1	0	1
Quillaja saponaria	10	0	0	0	0	0	1	0	0
Retanilla ephedra	8	0	0	0	0	0	0	0	0
Retanilla trinervia	8	0	1	0	0	0	0	0	0
Senna candolleana	17	1	0	1	1	0	0	0	0
Sophora macrocarpa	17	0	1	1	0	0	0	0	0
